# Supplementary material for: Correcting for Microbial Blooms in Fecal Samples during Room-Temperature Shipping
Source: PubMed Central journal article supplement (PMC5340865; doi:10.1128/msystems.00199-16), 2017-03-07

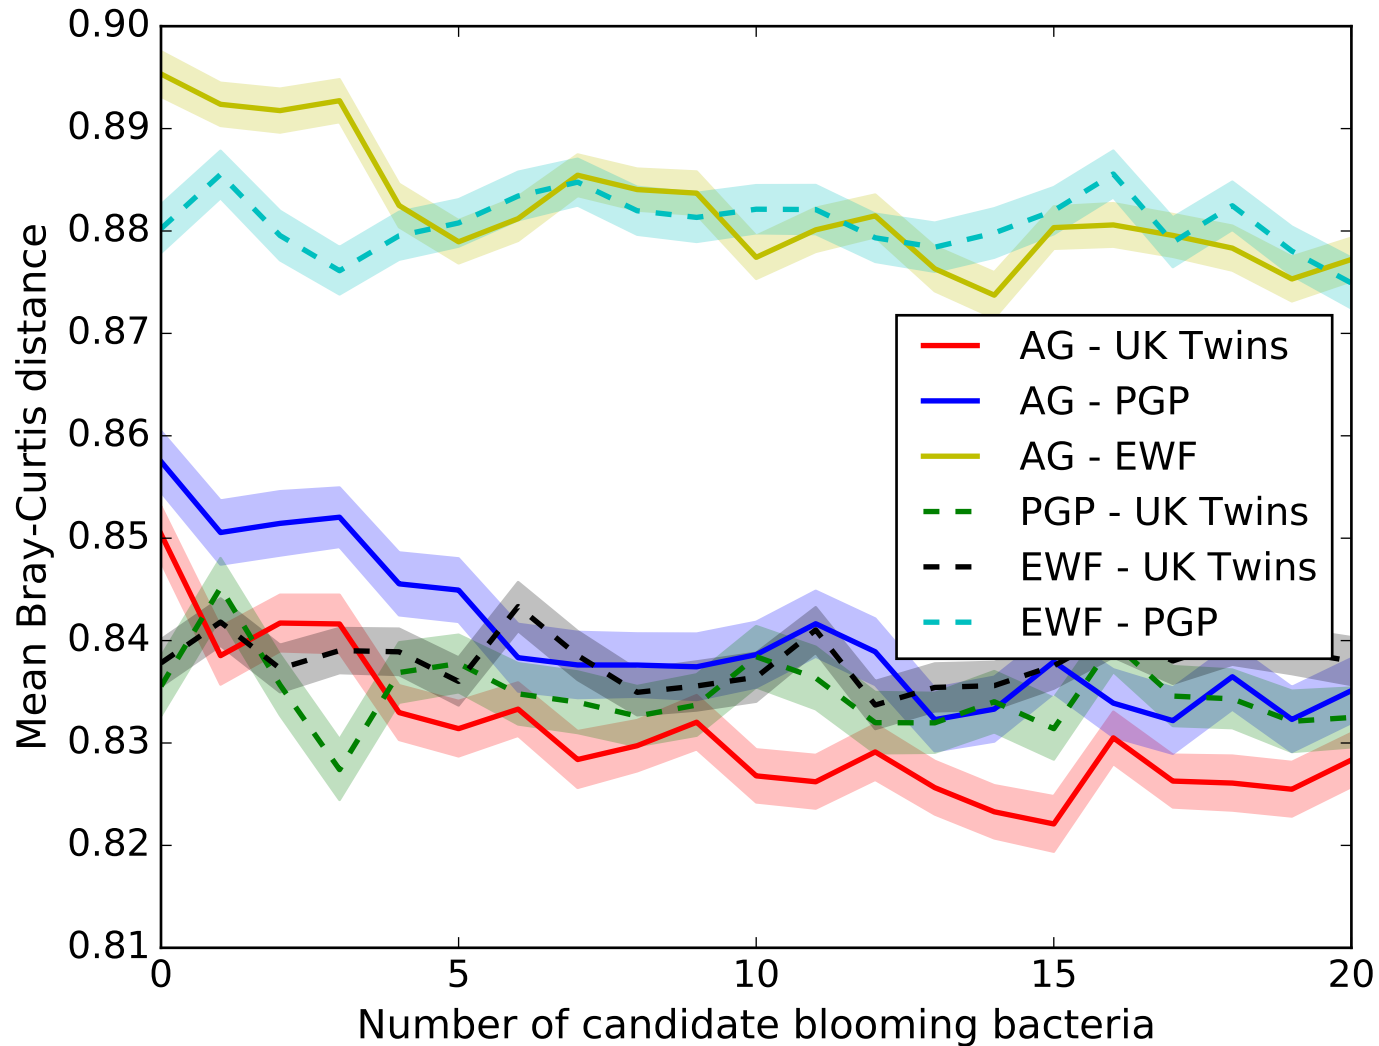

Supplement: sys002172095sf2.pdf [file sys002172095sf2.pdf]
